# Supplementary material for: Combined deletions of amyloid precursor protein and amyloid precursor-like protein 2 reveal different effects on mouse brain metal homeostasis
Source: Royal Society of Chemistry journal article supplement (doi:10.1039/c3mt00358b), 2014-01-01
Supplement: c3mt00358b.pdf [file c3mt00358b.pdf]

## SUPPLEMENTARY DATA

Supplementary Table 1: *p* values for data in Figure 1 when comparing changes in metal levels between 3 and 12 month, 3 and 18+ month and 12 and 18+ month old mice within a genotype.

|                         |    | WT  | APLP2 <sup>-/-</sup> | APP <sup>-/-</sup> | APP <sup>+/-</sup><br>APLP2 <sup>-/-</sup> | APP <sup>-/-</sup><br>APLP2 <sup>+/-</sup> |
|-------------------------|----|-----|----------------------|--------------------|--------------------------------------------|--------------------------------------------|
| 3 months vs 12 months   | Cu | *** | ***                  | ***                | ***                                        | ***                                        |
| 3 months vs 18+ months  |    | *** | ***                  | ***                | ***                                        | ***                                        |
| 12 months vs 18+ months |    | *** | ***                  | ***                | ***                                        | **                                         |
| 3 months vs 12 months   | Fe | *** | ***                  | ***                | ***                                        | ***                                        |
| 3 months vs 18+ months  |    | *** | ***                  | ***                | ***                                        | ***                                        |
| 12 months vs 18+ months |    | *** | ***                  | ***                | ***                                        | ns                                         |
| 3 months vs 12 months   | Zn | *   | **                   | ns                 | ns                                         | ns                                         |
| 3 months vs 18+ months  |    | *** | ***                  | ***                | **                                         | *                                          |
| 12 months vs 18+ months |    | *** | ***                  | ***                | **                                         | ns                                         |
| 3 months vs 12 months   | Mn | **  | ***                  | ***                | ***                                        | ns                                         |
| 3 months vs 18+ months  |    | ns  | ***                  | **                 | **                                         | ***                                        |
| 12 months vs 18+ months |    | *   | ns                   | ns                 | ns                                         | **                                         |

\* < 0.05; \*\* < 0.01; \*\*\* < 0.001; \*\*\*\* < 0.0001; ns = not significant
